# Supplementary material for: Selective hydrodeoxygenation of bio-oil derived products: ketones to olefins
Source: Royal Society of Chemistry journal article supplement (doi:10.1039/c5cy00367a), 2015-01-01
Supplement: c5cy00367a1.pdf [file c5cy00367a1.pdf]

**Selective Hydrodeoxygenation of Bio-Oil Derived  
Products: Ketones to Olefins**  
**Ayut Witsuthammakul and Tawan Sooknoi\***

Supporting information

**Table S1** % Metal content and surface area of metal catalysts and supports

| Catalyst               | Metal content<br>wt% | BET surface<br>area<br>(m <sup>2</sup> /g) | Catalyst                           | Metal content<br>wt% | BET surface<br>area<br>(m <sup>2</sup> /g) |
|------------------------|----------------------|--------------------------------------------|------------------------------------|----------------------|--------------------------------------------|
| 2%Cr/SiO <sub>2</sub>  | 2.03                 | 244                                        | 2%NiCu/SiO <sub>2</sub><br>(25%Cu) | 0.58(Cu);1.64(Ni)    | 240                                        |
| 10%Cr/SiO <sub>2</sub> | 9.17                 | 231                                        | 2%NiCu/SiO <sub>2</sub><br>(50%Cu) | 1.04(Cu);1.10(Ni)    | 241                                        |
| 2%Fe/SiO <sub>2</sub>  | 2.08                 | 243                                        | 2%NiCu/SiO <sub>2</sub><br>(70%Cu) | 1.58(Cu);0.56(Ni)    | 238                                        |
| 10%Fe/SiO <sub>2</sub> | 9.86                 | 229                                        | 2%NiCu/SiO <sub>2</sub><br>(80%Cu) | 1.90(Cu);0.43(Ni)    | 238                                        |
| 2%Co/SiO <sub>2</sub>  | 1.81                 | 245                                        | SiO <sub>2</sub>                   | -                    | 246                                        |
| 2%Pd/SiO <sub>2</sub>  | 1.70                 | 238                                        | 5%Cu/HY (100)                      | 5.08                 | 568                                        |
| 2%Ni/SiO <sub>2</sub>  | 2.12                 | 239                                        | HY (100)                           | -                    | 713                                        |
| 5%Ni/SiO <sub>2</sub>  | 5.01                 | 234                                        | 5%Cu/HZSM-5 (250)                  | 5.22                 | 361                                        |
| 8%Ni/SiO <sub>2</sub>  | 8.05                 | 212                                        | HZSM-5 (250)                       | -                    | 376                                        |
| 20%Ni/SiO <sub>2</sub> | 20.3                 | 208                                        | H-β (14)                           | -                    | 523                                        |
| 40%Ni/SiO <sub>2</sub> | 42.0                 | 137                                        |                                    |                      |                                            |
| 2%Cu/SiO <sub>2</sub>  | 2.05                 | 242                                        |                                    |                      |                                            |
| 5%Cu/SiO <sub>2</sub>  | 5.08                 | 240                                        |                                    |                      |                                            |
| 10%Cu/SiO <sub>2</sub> | 10.7                 | 220                                        |                                    |                      |                                            |
| 15%Cu/SiO <sub>2</sub> | 16.4                 | 214                                        |                                    |                      |                                            |
| 40%Cu/SiO <sub>2</sub> | 36.1                 | 144                                        |                                    |                      |                                            |

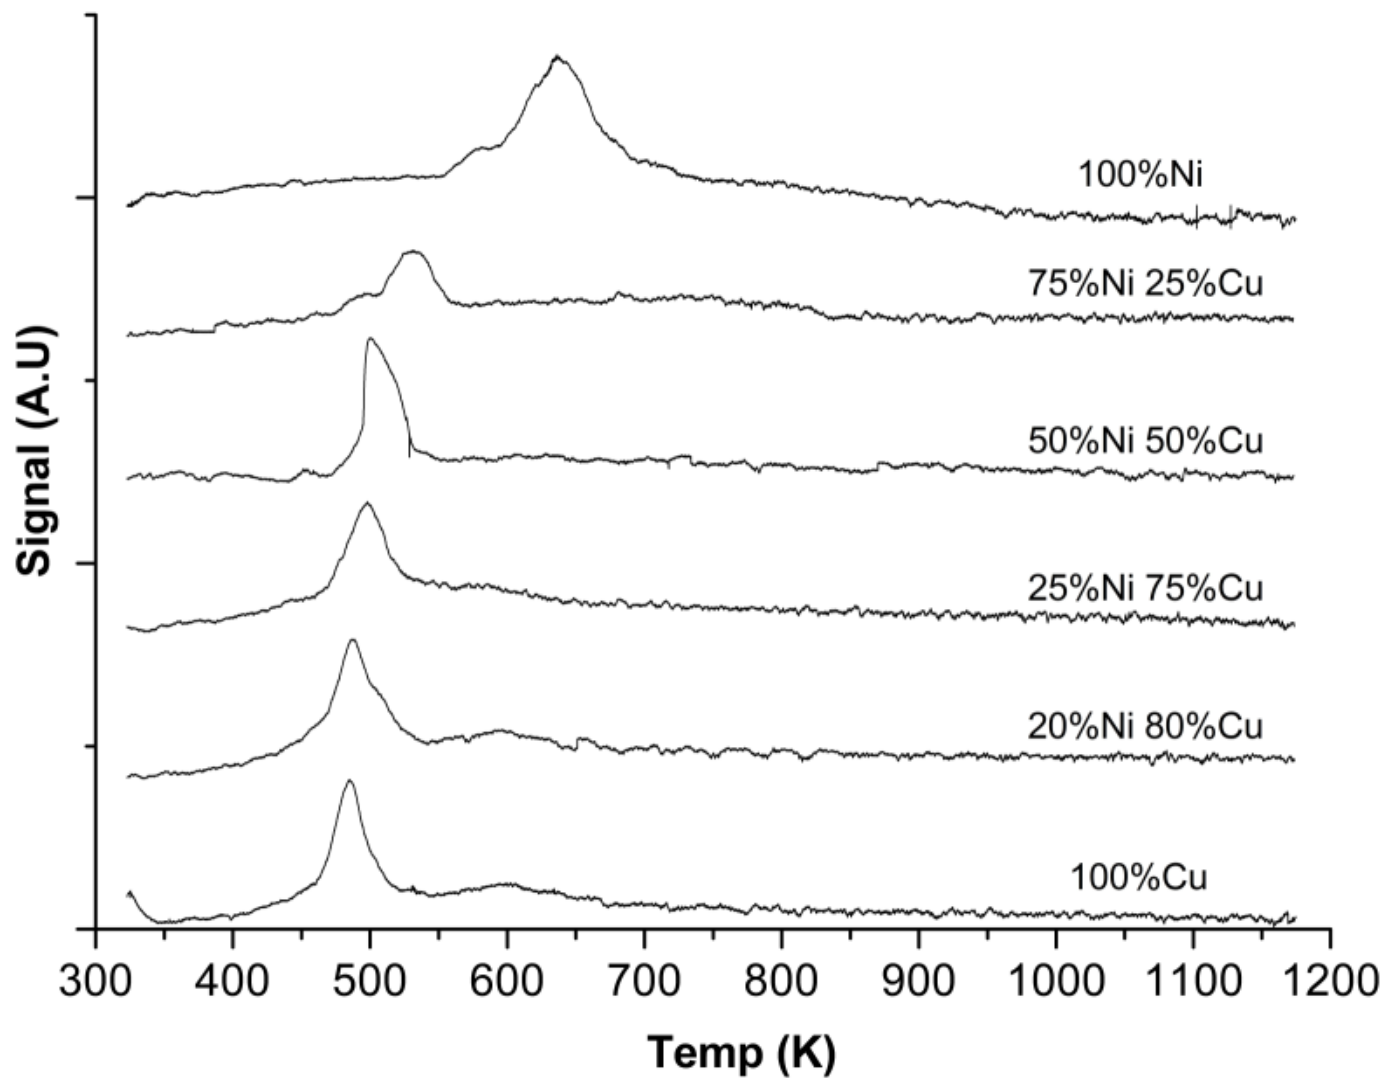

**Figure S1** Temperature program reduction of 2% Ni-Cu alloy on SiO<sub>2</sub>

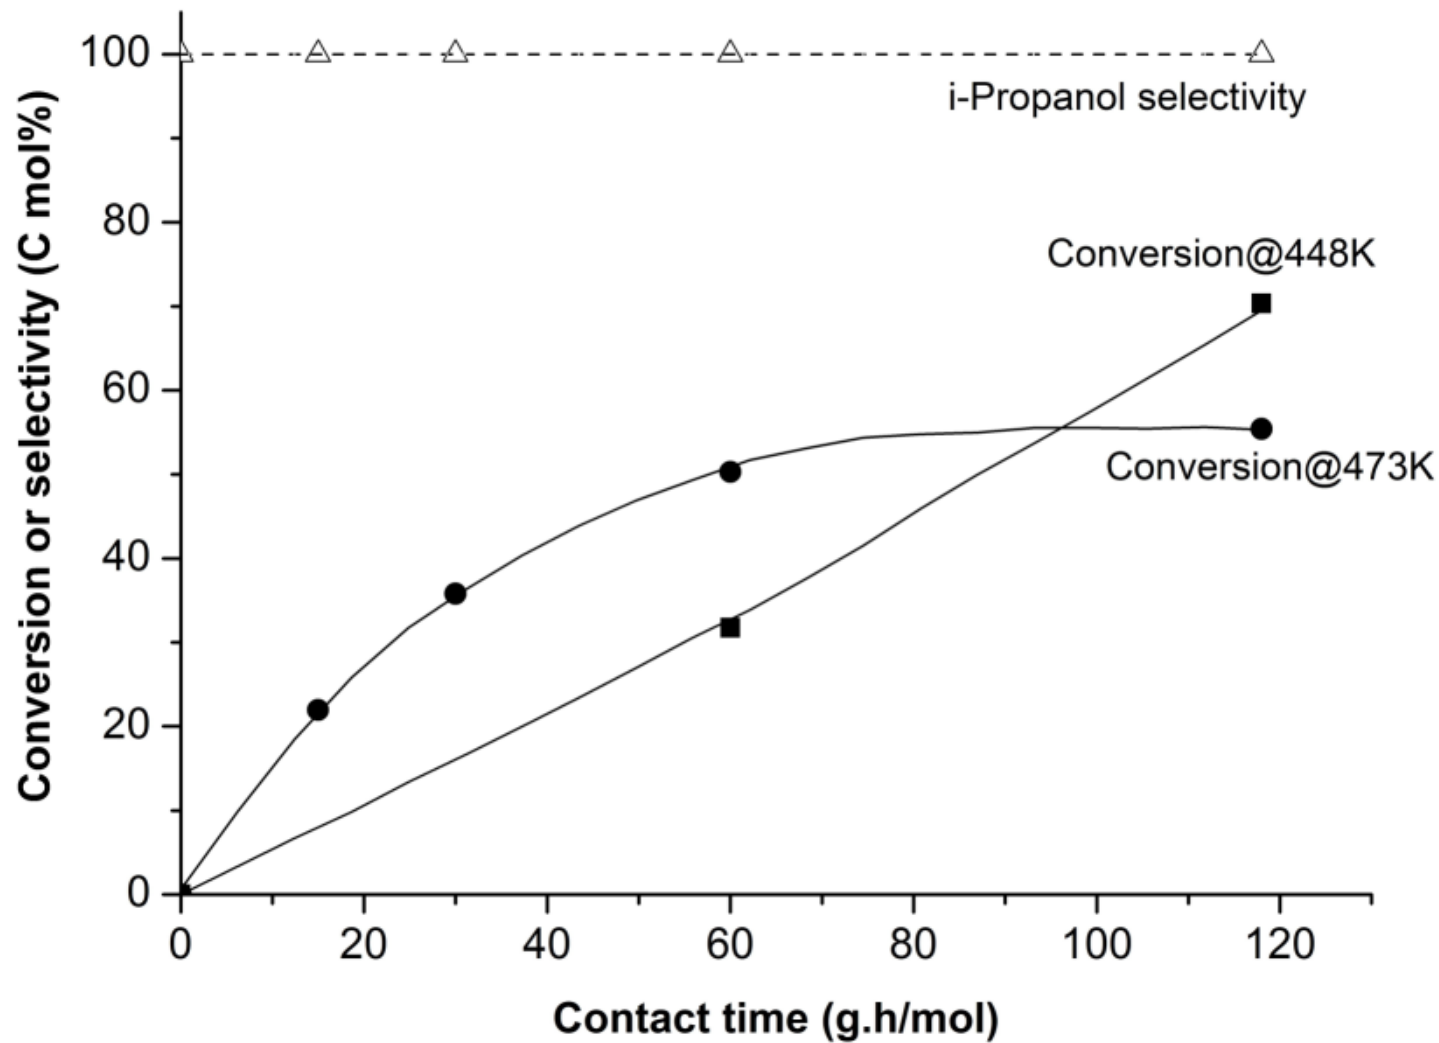

**Figure S2** Effect of contact time for acetone hydrogenation on 2%Cu/SiO<sub>2</sub> at 448 and 473 K; H<sub>2</sub> as carrier 30 m/min

**Table S2** Copper surface area and turnover frequency for acetone conversion

| <b>Catalyst</b>              | <b>H<sub>2</sub> consumption</b><br>mmol.g <sup>-1</sup> <sub>Cu</sub> ) | <b>Cu area</b><br>(m <sup>2</sup> .g <sup>-1</sup> <sub>Cu</sub> ) | <b>Contact time</b><br>(g.h.mol <sup>-1</sup> ) | <b>TOF</b><br>x10 <sup>-3</sup> (h <sup>-1</sup> ) |
|------------------------------|--------------------------------------------------------------------------|--------------------------------------------------------------------|-------------------------------------------------|----------------------------------------------------|
| <b>2%Cu/SiO<sub>2</sub></b>  | 0.51                                                                     | 257                                                                | 30                                              | n/a                                                |
| <b>5%Cu/SiO<sub>2</sub></b>  | 1.6                                                                      | 646                                                                | 30                                              | 2.5                                                |
| <b>10%Cu/SiO<sub>2</sub></b> | 3.3                                                                      | 437                                                                | 30                                              | 2.1                                                |
| <b>15%Cu/SiO<sub>2</sub></b> | 7.1                                                                      | 220                                                                | 30                                              | 2.7                                                |
| <b>5%Cu/HY (100)</b>         | 1.7                                                                      | 499                                                                | 19                                              | 7.2                                                |
| <b>5%Cu/HZSM-5 (250)</b>     | 1.7                                                                      | 414                                                                | 19                                              | 4.9                                                |

*<sup>a</sup>Hydrogenation at 473 K*

*<sup>b</sup>Hydrodeoxygenation at 473 K*
